# Supplementary material for: N-doped carbon dots with high sensitivity and selectivity for hypochlorous acid detection and its application in water
Source: Royal Society of Chemistry journal article supplement (doi:10.1039/c5ay00944h), 2015-01-01
Supplement: c5ay00944h1.pdf [file c5ay00944h1.pdf]

## Supplementary Data

### N-doped Carbon Dots with high sensitivity and selectivity for hypochlorous acid detection and its application in water

*Dongmei Wang<sup>a</sup>, Hui Xu<sup>a</sup>, Baozhan Zheng<sup>a</sup>, Yang Li<sup>a</sup>, Maoping Liu<sup>a</sup>, Juan Du<sup>a\*</sup>, and  
Dan Xiao<sup>a,b\*</sup>*

<sup>a</sup> College of Chemistry, Sichuan University, Chengdu, 610064, PR China.

<sup>b</sup> College of Chemical Engineering, Sichuan University, Chengdu, 610065, PR China.

\*Corresponding author:

E-mail: dujuanchem@scu.edu.cn (Juan Du)

Tel: +86-28-85415029

#### Preparation of ROS and RNS

Various ROS and RNS including HOCl, H<sub>2</sub>O<sub>2</sub>, TBHP, TBO·, ONOO<sup>-</sup>, ·OH, O<sub>2</sub><sup>-</sup>, <sup>1</sup>O<sub>2</sub>, NO<sub>2</sub><sup>-</sup>, were prepared according to the following methods.

Generation of HOCl: HOCl was prepared from the source of NaOCl in 7.4 PBS buffer. The concentration of the HOCl stock solution was determined by titration of Na<sub>2</sub>S<sub>2</sub>O<sub>3</sub>.

Generation of H<sub>2</sub>O<sub>2</sub>: The H<sub>2</sub>O<sub>2</sub> stock solution was purchased from Chengdu Kelong Chemical Factory. The concentration of H<sub>2</sub>O<sub>2</sub> was titrated according to iodometry.

Generation of TBHP: A 10 mM stock solution of t-BuOOH was firstly prepared in anhydrous ethanol and then added into the probe testing solution.

Generation of tert-butoxy radical (TBO·): TBO· were generated by Fenton reaction of TBHP with Fe<sup>2+</sup>.<sup>1</sup>

Generation of peroxynitrite (ONOO<sup>-</sup>): Peroxynitrite solution was synthesized as reported.<sup>2</sup> Firstly, hydrogen peroxide (0.7 M) was acidified with hydrochloric acid (0.6 M), the mixture solution and sodium nitrite (0.6 M) was added into sodium hydroxide (1.25 M) simultaneously. Then 0.08 g MnO<sub>2</sub> was added with vigorously stirring at room temperature to remove the superfluous H<sub>2</sub>O<sub>2</sub>. After the filtration the resulting solution was stored at lower than -18 °C. The

concentration of the ONOO<sup>-</sup> stock solution was determined by measuring the absorbance at 302 nm with a molar extinction coefficient of 1670 M<sup>-1</sup>·cm<sup>-1</sup>.

Generation of ·OH: Hydroxyl radical (·OH) was generated in the Fenton system from ferrous sulfate and hydrogen peroxide.

Generation of superoxide solution (·O<sub>2</sub><sup>-</sup>): ·O<sub>2</sub><sup>-</sup> was prepared by adding KO<sub>2</sub> to dry dimethyl sulfoxide and stirring vigorously for 2 min.<sup>3</sup>

Generation of singlet oxygen (<sup>1</sup>O<sub>2</sub>): <sup>1</sup>O<sub>2</sub> was produced from the H<sub>2</sub>O<sub>2</sub>/NaMoO<sub>4</sub> system.<sup>1</sup>

Generation of NO<sub>2</sub><sup>-</sup>: NaNO<sub>2</sub> was used as NO<sub>2</sub><sup>-</sup> source.

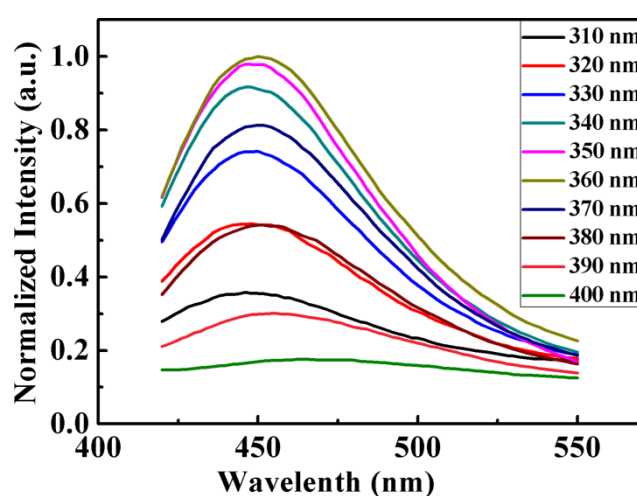

Fig. S1 Emission spectra of N-doped CDs at different excitation wavelength.

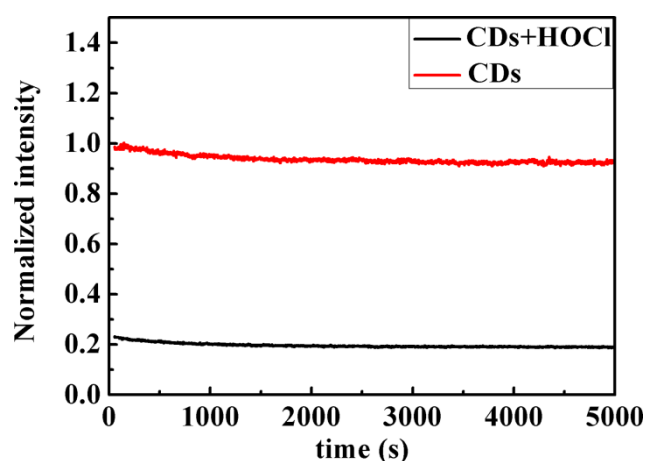

Fig. S2. The time-dependent fluorescence intensity of N-doped CDs (12 µg·mL<sup>-1</sup>) in the absence (red line) and presence (black line) of 20 µM HOCl in PBS solution (50 mM, pH = 7.4). ( $\lambda_{\text{ex}}$  = 360 nm,  $\lambda_{\text{em}}$  = 448 nm).

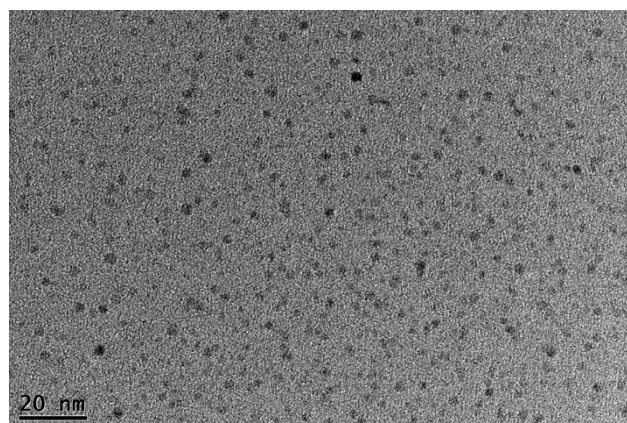

Fig. S3. TEM image of N-free CDs.

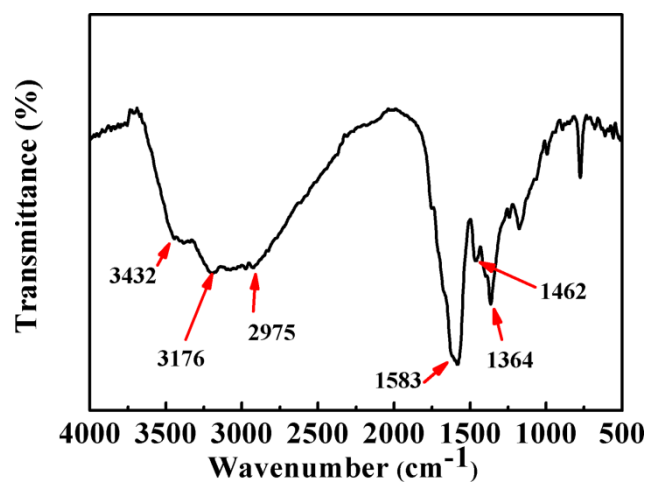

Fig. S4. The FT-IR spectrum of the N-doped CDs.

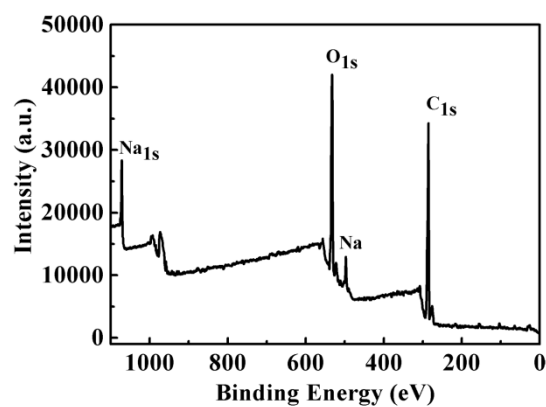

Fig. S5. XPS spectrum of N-free CDs.

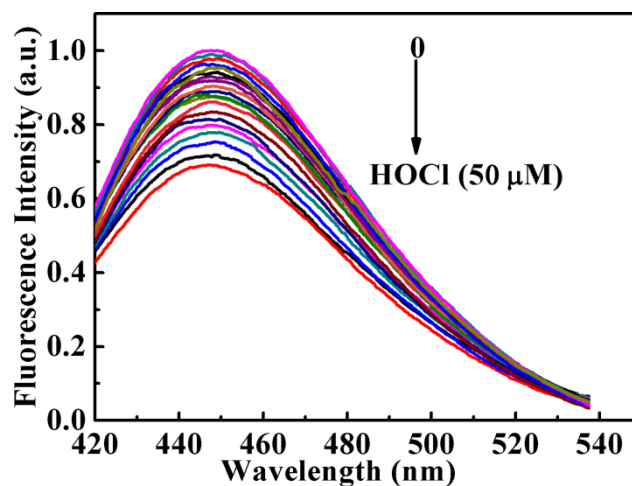

53

54 Fig. S6 Fluorescence spectra of N-free CDs in the presence of various concentrations of HOCl.

55

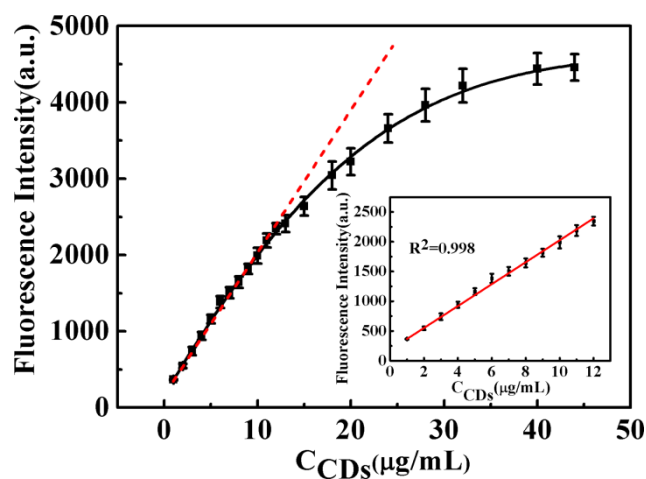

56

57 Fig. S7. Concentration-dependent of fluorescence response of N-doped CDs in PBS solution (50  
58 mM, pH =7.4). The inset showed the linear response of fluorescence intensity versus the  
59 concentration of N-doped CDs. The error bar represented the standard deviation of three  
60 measurements.

61

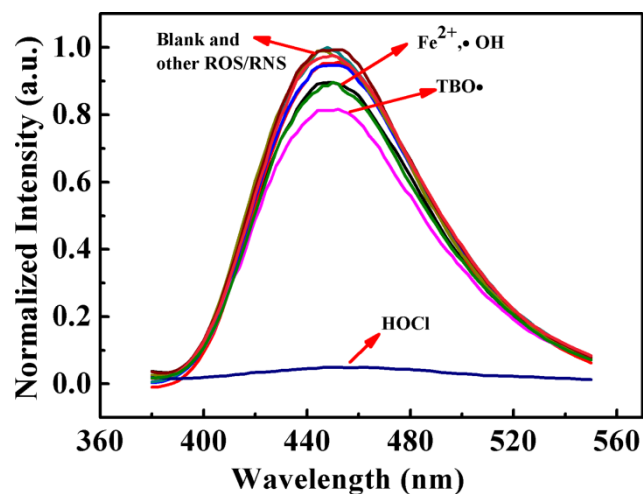

62

63 Fig. S8. Fluorescence responses of N-doped CDs ( $12 \mu\text{g}\cdot\text{mL}^{-1}$ ) to various ROS/RNS in PBS  
 64 solution (50 mM, pH=7.4) ( $\lambda_{\text{ex}} = 360 \text{ nm}$ ). ROS/RNS including: TBHP (200  $\mu\text{M}$ ), TBO $\cdot$  (200  $\mu\text{M}$ ),  
 65  $\text{H}_2\text{O}_2$  (500  $\mu\text{M}$ ),  $^1\text{O}_2$  (200  $\mu\text{M}$ ),  $\cdot\text{O}_2^-$  (200  $\mu\text{M}$ ),  $\text{ONOO}^-$  (100  $\mu\text{M}$ ),  $\text{NO}_2^-$  (500  $\mu\text{M}$ ),  $\cdot\text{OH}$  (80  $\mu\text{M}$ ),  
 66 HOCl (30  $\mu\text{M}$ ).

67

## 68 References

- 69 1. G. Chen, F. Song, J. Wang, Z. Yang, S. Sun, J. Fan, X. Qiang, X. Wang, B. Dou and X.  
 70 Peng, *Chem. Commun.*, 2012, 48, 2949-2951.
- 71 2. J. W. Reed, H. H. Ho and W. L. Jolly, *J. Am. Chem. Soc.*, 1974, 96, 1248-1249.
- 72 3. A. R. Lippert, E. J. New and C. J. Chang, *J. Am. Chem. Soc.*, 2011, 133, 10078-10080.
